# Supplementary material for: Pre-existing conditions are associated with COVID patients’ hospitalization, despite confirmed clearance of SARS-CoV-2 virus
Source: bioRxiv or medRxiv preprint supplement (doi:10.1101/2020.10.28.20221655), 2020-11-03
Supplement: Supplementary file [file media-1.pdf]

## Supplementary Material

**Table S1. Enrichments of all phenotypes in the Pre-COVID time horizon for 1, 2, and 3 note thresholds.** Phenotypes in the hospitalized and non-hospitalized post-clearance cohorts, along with results from statistical significance tests the time period one year prior to up to 11 days prior to the first positive SARS-CoV-2 PCR test for a patient. Features which are significantly different between the two cohorts are highlighted in green. The columns are: **(1) Phenotype:** phenotype of interest, **(2) Minimum distinct positive mentions:** Minimum number of distinct mentions in the physician notes with a positive sentiment required to record a phenotype, **(3) Hospitalized post-clearance:** number of patients in the hospitalized post-clearance cohort with the phenotype recorded in the Pre-COVID time horizon, **(4) Non-Hospitalized post-clearance:** number of patients in the non-hospitalized post-clearance cohort with the phenotype recorded in the Pre-COVID time horizon, **(5) BH-corrected p-value:** Benjamani-Hochberg corrected p-values using Fisher Exact test for comparisons of proportions, **(6) Relative risk (95% CI):** Ratio of the phenotype incidence in the hospitalized post-clearance cohort to the phenotype incidence in the non-hospitalized post-clearance cohort, along with 95% confidence interval bounds.

| Phenotype                                               | Minimum distinct positive mentions | Hospitalized Post Clearance (93 patients) | Non-Hospitalized Post-Clearance (173 patients) | BH-corrected p-value | Relative risk (95% CI) |
|---------------------------------------------------------|------------------------------------|-------------------------------------------|------------------------------------------------|----------------------|------------------------|
| Acute kidney injury                                     | 1                                  | 15 (16.1%)                                | 7 (4%)                                         | 0.03                 | 4 (1.7, 8.8)           |
| Acute kidney injury                                     | 2                                  | 11 (11.8%)                                | 6 (3.5%)                                       | 0.12                 | 3.4 (1.3, 8.3)         |
| Acute kidney injury                                     | 3                                  | 9 (9.7%)                                  | 5 (2.9%)                                       | 0.21                 | 3.3 (1.2, 8.9)         |
| Anemia                                                  | 1                                  | 26 (28%)                                  | 27 (15.6%)                                     | 0.19                 | 1.8 (1.1, 2.9)         |
| Anemia                                                  | 2                                  | 21 (22.6%)                                | 18 (10.4%)                                     | 0.12                 | 2.2 (1.2, 3.8)         |
| Anemia                                                  | 3                                  | 20 (21.5%)                                | 12 (6.9%)                                      | 0.02                 | 3.1 (1.6, 5.9)         |
| Acute respiratory distress syndrome / acute lung injury | 1                                  | 3 (3.2%)                                  | 4 (2.3%)                                       | 1                    | 1.4 (0.36, 5.7)        |
| Acute respiratory distress syndrome / acute lung injury | 2                                  | 2 (2.2%)                                  | 2 (1.2%)                                       | 1                    | 1.9 (0.33, 10)         |
| Acute respiratory distress syndrome / acute lung injury | 3                                  | 2 (2.2%)                                  | 2 (1.2%)                                       | 1                    | 1.9 (0.33, 10)         |
| Cardiac arrest                                          | 1                                  | 1 (1.1%)                                  | 1 (0.6%)                                       | 1                    | 1.9 (0.2, 18)          |

|                       |   |            |            |      |                   |
|-----------------------|---|------------|------------|------|-------------------|
| Cardiac arrest        | 2 | 0 (0%)     | 0 (0%)     | 1    | nan (0.037, 93)   |
| Cardiac arrest        | 3 | 0 (0%)     | 0 (0%)     | 1    | nan (0.037, 93)   |
| Cardiac arrhythmias   | 1 | 26 (28%)   | 32 (18.5%) | 0.47 | 1.5 (0.96, 2.4)   |
| Cardiac arrhythmias   | 2 | 21 (22.6%) | 24 (13.9%) | 0.46 | 1.6 (0.96, 2.7)   |
| Cardiac arrhythmias   | 3 | 21 (22.6%) | 17 (9.8%)  | 0.05 | 2.3 (1.3, 4.1)    |
| Heart failure         | 1 | 8 (8.6%)   | 10 (5.8%)  | 1    | 1.5 (0.63, 3.6)   |
| Heart failure         | 2 | 8 (8.6%)   | 7 (4%)     | 0.65 | 2.1 (0.81, 5.4)   |
| Heart failure         | 3 | 7 (7.5%)   | 7 (4%)     | 0.95 | 1.9 (0.69, 4.9)   |
| Hyperglycemia         | 1 | 7 (7.5%)   | 22 (12.7%) | 0.71 | 0.59 (0.28, 1.4)  |
| Hyperglycemia         | 2 | 6 (6.5%)   | 13 (7.5%)  | 1    | 0.86 (0.36, 2.2)  |
| Hyperglycemia         | 3 | 3 (3.2%)   | 11 (6.4%)  | 0.95 | 0.51 (0.17, 1.8)  |
| Hypertension          | 1 | 42 (45.2%) | 62 (35.8%) | 0.6  | 1.3 (0.93, 1.7)   |
| Hypertension          | 2 | 33 (35.5%) | 50 (28.9%) | 0.87 | 1.2 (0.86, 1.8)   |
| Hypertension          | 3 | 29 (31.2%) | 46 (26.6%) | 0.95 | 1.2 (0.8, 1.7)    |
| Myocardial infarction | 1 | 2 (2.2%)   | 4 (2.3%)   | 1    | 0.93 (0.22, 4.7)  |
| Myocardial infarction | 2 | 2 (2.2%)   | 4 (2.3%)   | 1    | 0.93 (0.22, 4.7)  |
| Myocardial infarction | 3 | 1 (1.1%)   | 3 (1.7%)   | 1    | 0.62 (0.12, 5.3)  |
| Pleural effusion      | 1 | 7 (7.5%)   | 12 (6.9%)  | 1    | 1.1 (0.47, 2.7)   |
| Pleural effusion      | 2 | 6 (6.5%)   | 10 (5.8%)  | 1    | 1.1 (0.45, 2.9)   |
| Pleural effusion      | 3 | 5 (5.4%)   | 7 (4%)     | 1    | 1.3 (0.47, 4)     |
| Pulmonary embolism    | 1 | 2 (2.2%)   | 6 (3.5%)   | 1    | 0.62 (0.17, 3)    |
| Pulmonary embolism    | 2 | 1 (1.1%)   | 6 (3.5%)   | 0.98 | 0.31 (0.074, 2.5) |
| Pulmonary embolism    | 3 | 1 (1.1%)   | 6 (3.5%)   | 0.95 | 0.31 (0.074, 2.5) |
| Respiratory failure   | 1 | 1 (1.1%)   | 6 (3.5%)   | 1    | 0.31 (0.074, 2.5) |
| Respiratory failure   | 2 | 1 (1.1%)   | 6 (3.5%)   | 0.98 | 0.31 (0.074, 2.5) |

|                                                        |   |          |          |      |                  |
|--------------------------------------------------------|---|----------|----------|------|------------------|
| Respiratory failure                                    | 3 | 1 (1.1%) | 5 (2.9%) | 1    | 0.37 (0.084, 3)  |
| Sepsis                                                 | 1 | 5 (5.4%) | 8 (4.6%) | 1    | 1.2 (0.42, 3.4)  |
| Sepsis                                                 | 2 | 4 (4.3%) | 5 (2.9%) | 1    | 1.5 (0.45, 5.1)  |
| Sepsis                                                 | 3 | 4 (4.3%) | 4 (2.3%) | 0.95 | 1.9 (0.51, 6.7)  |
| Septic shock                                           | 1 | 1 (1.1%) | 2 (1.2%) | 1    | 0.93 (0.15, 8.3) |
| Septic shock                                           | 2 | 1 (1.1%) | 2 (1.2%) | 1    | 0.93 (0.15, 8.3) |
| Septic shock                                           | 3 | 1 (1.1%) | 1 (0.6%) | 1    | 1.9 (0.2, 18)    |
| Stroke /<br>Cerebrovascular<br>incident                | 1 | 0 (0%)   | 3 (1.7%) | 1    | 0 (0.014, 5.1)   |
| Stroke /<br>Cerebrovascular<br>incident                | 2 | 0 (0%)   | 3 (1.7%) | 1    | 0 (0.014, 5.1)   |
| Stroke /<br>Cerebrovascular<br>incident                | 3 | 0 (0%)   | 1 (0.6%) | 1    | 0 (0.025, 15)    |
| Venous<br>thromboembolism<br>/ deep vein<br>thrombosis | 1 | 4 (4.3%) | 6 (3.5%) | 1    | 1.2 (0.4, 4.2)   |
| Venous<br>thromboembolism<br>/ deep vein<br>thrombosis | 2 | 3 (3.2%) | 4 (2.3%) | 1    | 1.4 (0.36, 5.7)  |
| Venous<br>thromboembolism<br>/ deep vein<br>thrombosis | 3 | 3 (3.2%) | 4 (2.3%) | 1    | 1.4 (0.36, 5.7)  |
